# Supplementary material
Source: PubMed Central journal article supplement (PMC4976076)
Supplement: NIHMS69181-supplement-Supporting_Information.pdf [file NIHMS69181-supplement-Supporting_Information.pdf]

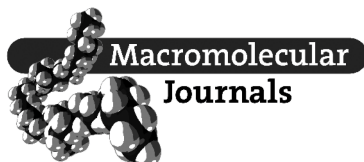

## Supporting Information

for *Macromol. Biosci.*, DOI: 10.1002/mabi.201600035

Macromolecular Pt(IV) Prodrugs from  
Poly(organo)phosphazenes

Helena Henke, Kushtrim Kryeziu, Jelena Banfić, Sarah  
Theiner, Wilfried Körner, Oliver Brüggemann, Walter Berger,  
Bernhard K. Keppler, Petra Heffeter,\* Ian Teasdale\*

Supporting Information

for *Macromol. Biosci.*, DOI: 10.1002/mabi.201600035

**Macromolecular Pt(IV) prodrugs from poly(organo)phosphazenes**

Helena Henke‡,(a) Kushtrim Kryeziu‡,(b, e) Jelena Banfić,(c) Sarah Theiner,(c, e) Wilfried Körner,(d) Oliver Brüggemann,(a) Walter Berger,(b, e) Bernhard K. Keppler,(c, e) Petra Heffeter\*,(b, e) Ian Teasdale\*\*(a)

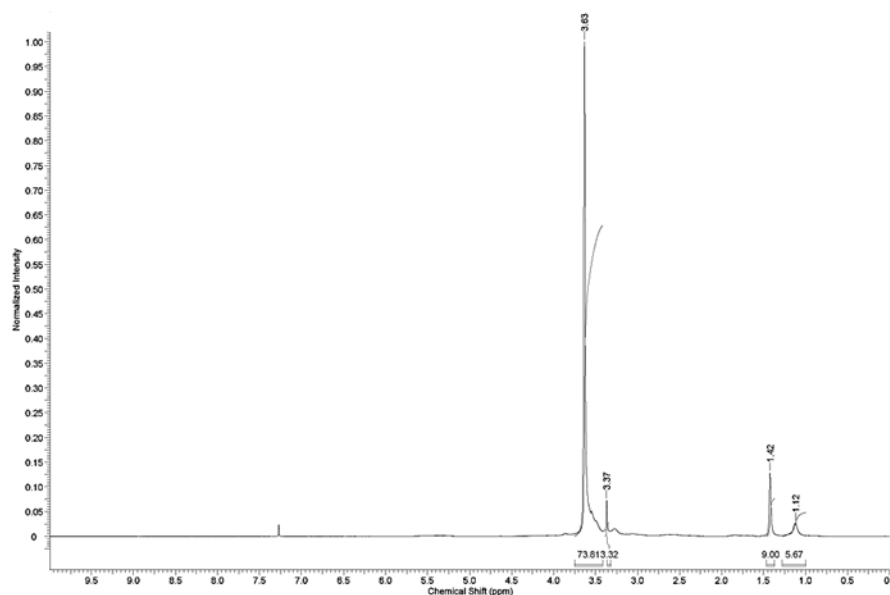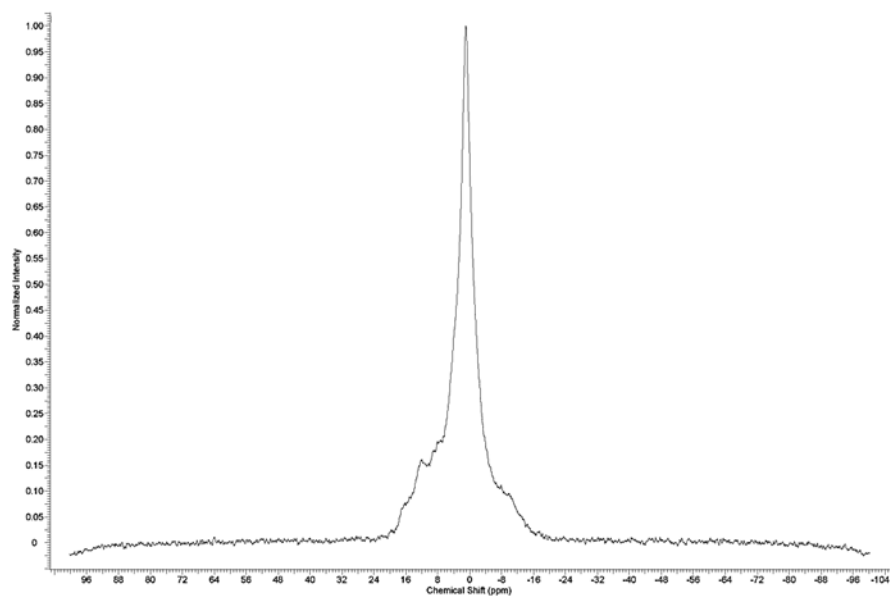

**Figure SI-1:**  $^1\text{H}$  (top) and  $\{^1\text{H}\}^{31}\text{P}$  NMR (bottom) of polymer **P-a** in  $\text{CDCl}_3$ .

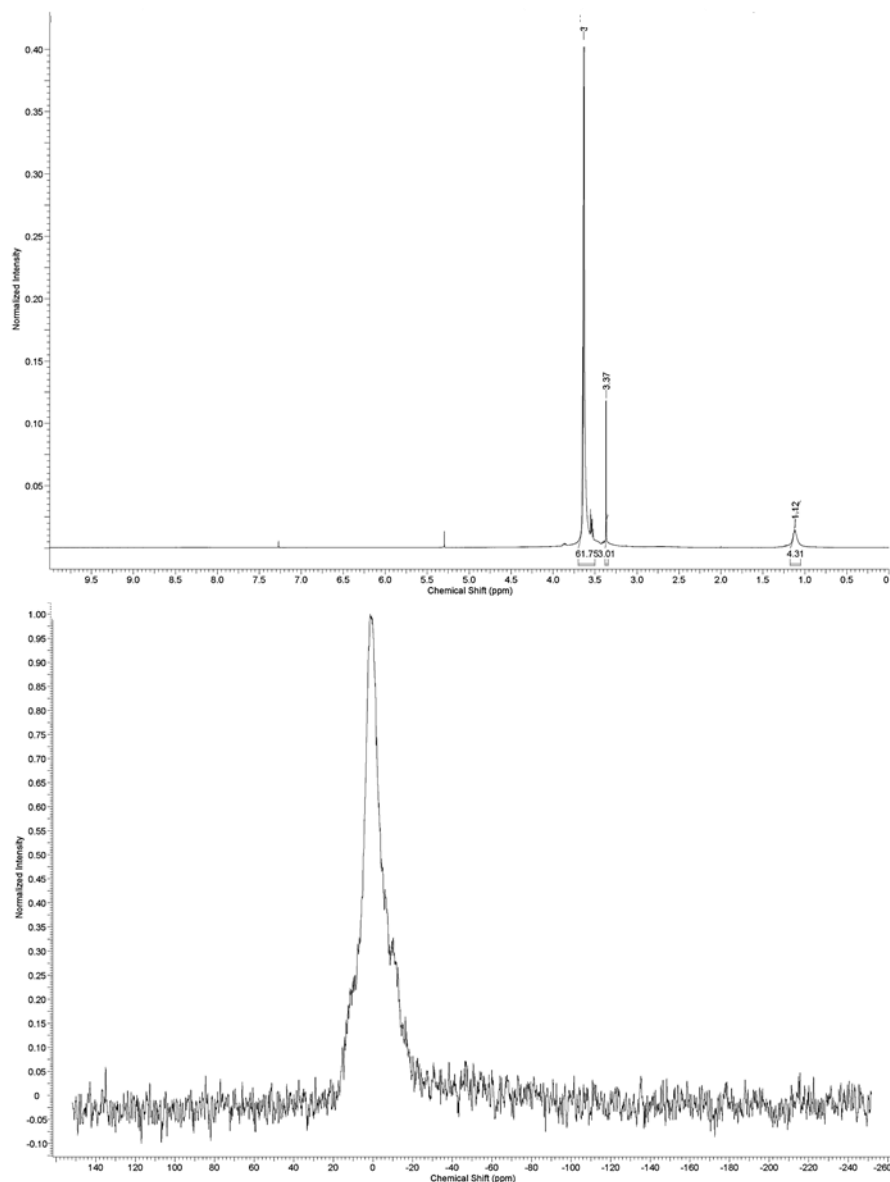

**Figure SI-2:**  $^1\text{H}$  (top) and  $\{^1\text{H}\}^{31}\text{P}$  NMR (bottom) of boc-protected polymer **P-b** in  $\text{CDCl}_3$ .

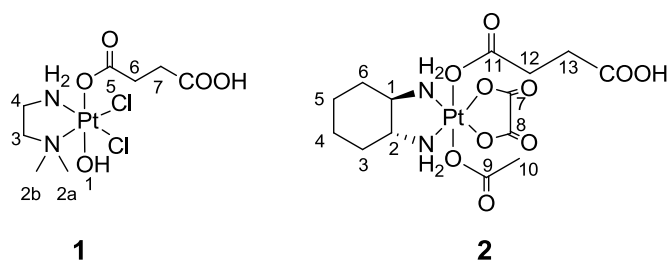

**Figure SI-3:** Numbered Pt(IV) complexes **1** and **2**.

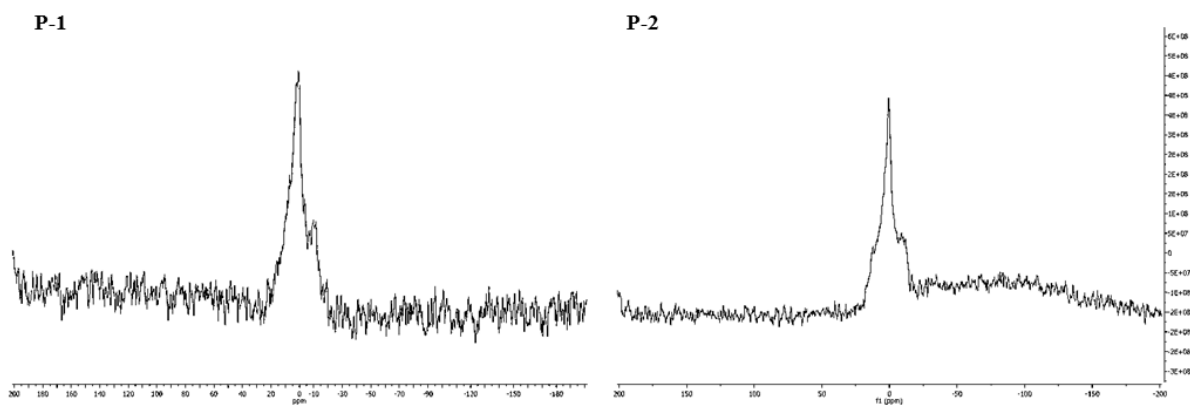

**Figure SI-4:**  $\{^1\text{H}\}^{31}\text{P}$  NMR polymer conjugates **P-1** (left) and **P-2** (right) in DMSO- $d_6$ .

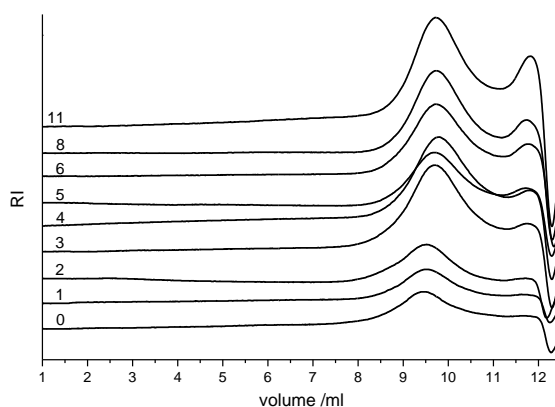

**Figure SI-5:** Degradation study of poly(organo)phosphazene with free amino groups. GPC measurements of aliquots of **P-c** after incubation at pH 7.4 and 37 °C over the course of 11 weeks showed minimal degradation.

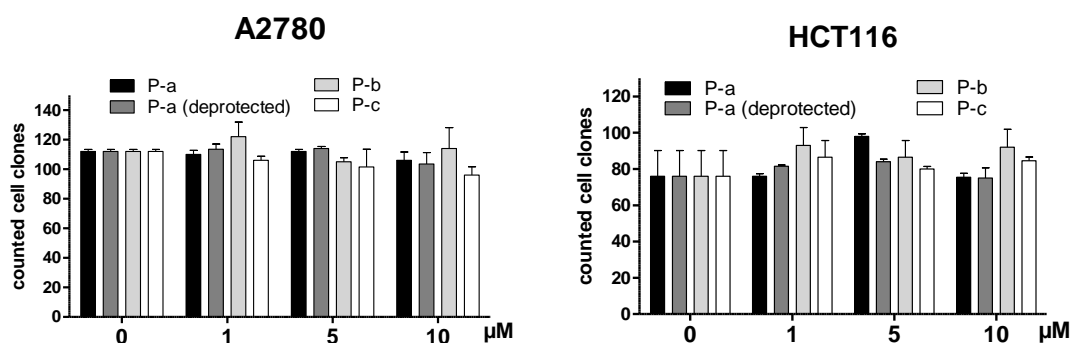

**Figure SI-6:** Viability of cancer cells after treatment with unloaded polymers. A2780 ovarian cancer cells and HCT116 colorectal carcinoma cells were treated with **P-a**, deprotected **P-a**, **P-b** and **P-c**. Clonogenic survival was determined after exposure to the indicated drug concentrations for 7 days. Cell colonies were visualized by crystal violet staining and counted.
